# Supplementary material
Source: Springer Nature journal article supplement (https://www.springermedizin.de/resource/supplementary/12875_2014_1039_MOESM1_ESM.pdf/9435984)

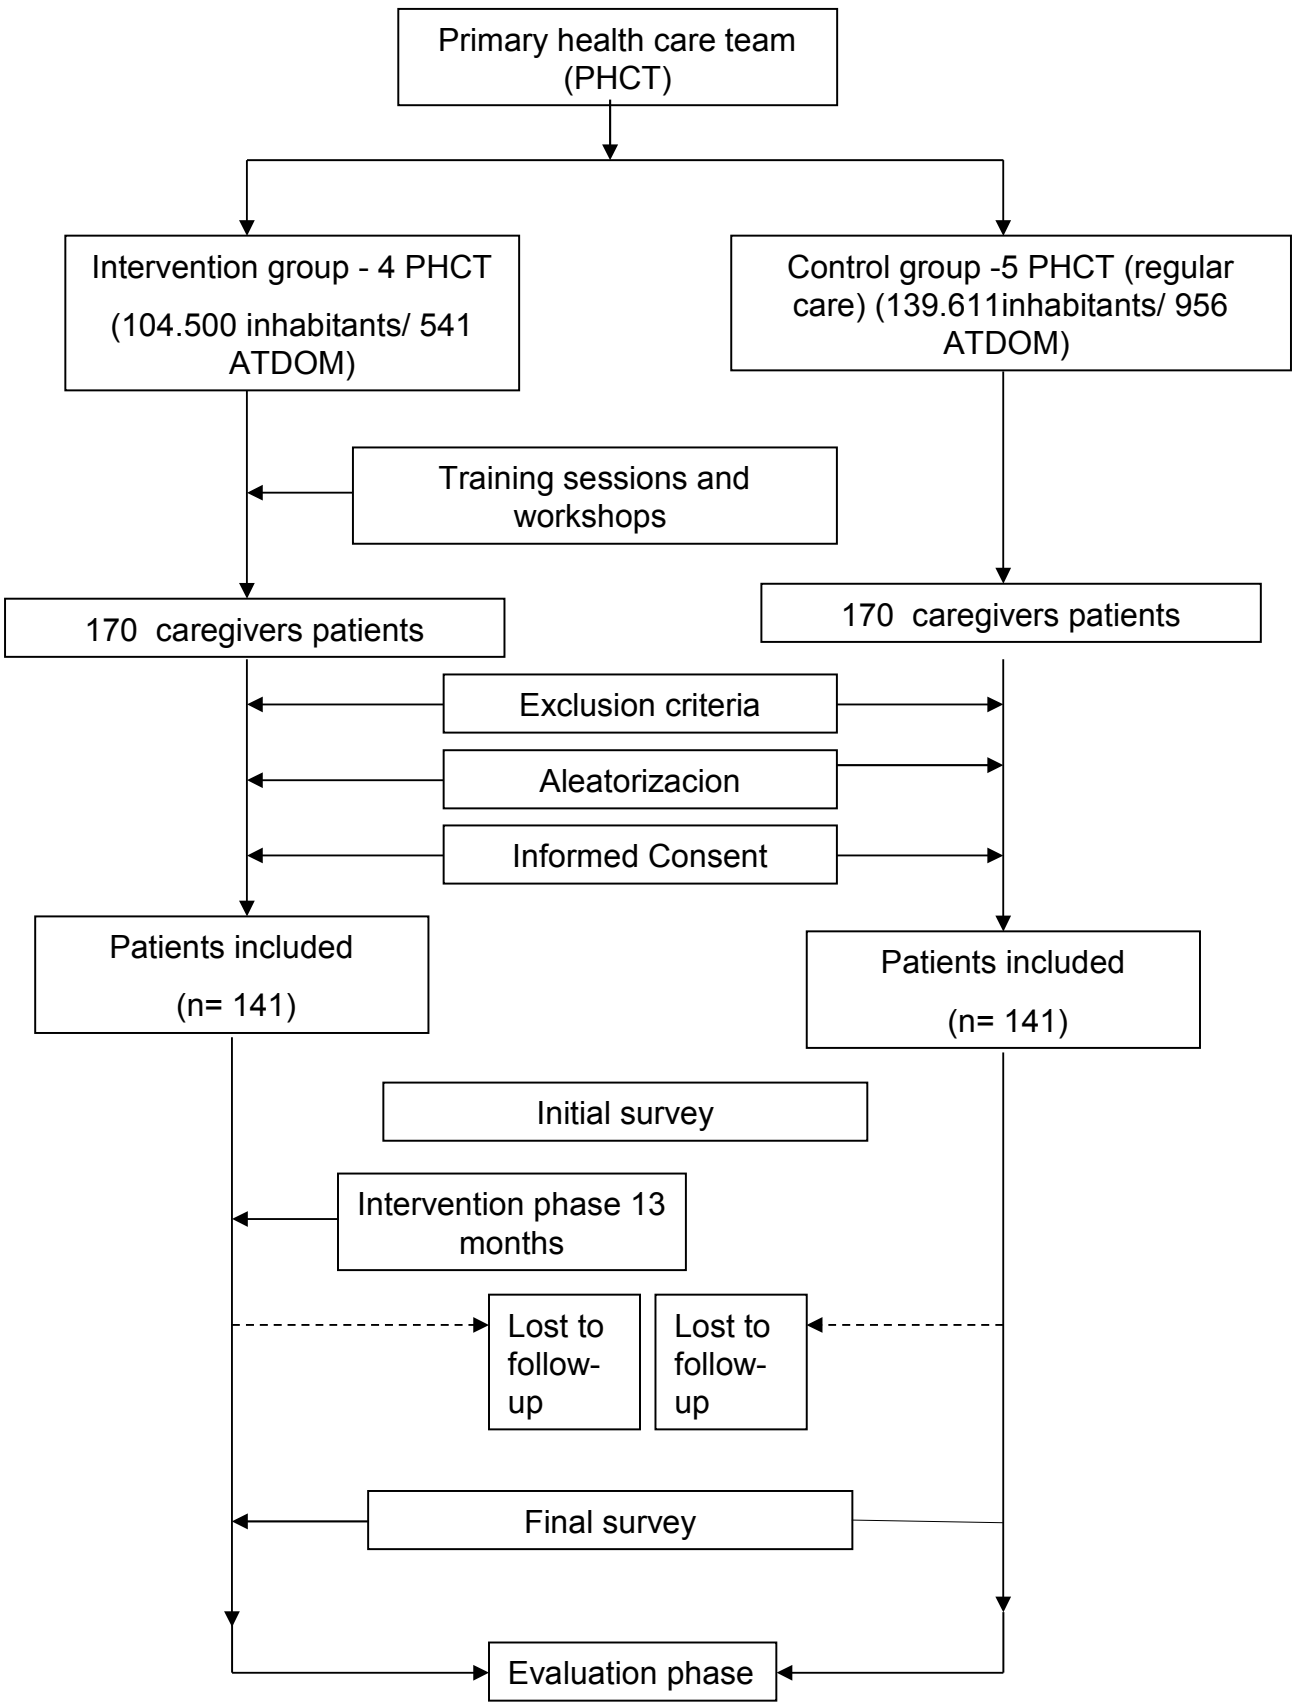

Supplement: MOESM1 [file 9435984]
